# Supplementary material for: Phytochemistry and Evidence-Based Traditional Uses of the Genus Achillea L.: An Update (2011–2021)
Source: MDPI journal article supplement (doi:10.3390/scipharm89040050), 2021-11-22
Supplement: s1 [file s1]

## Supplementary Materials

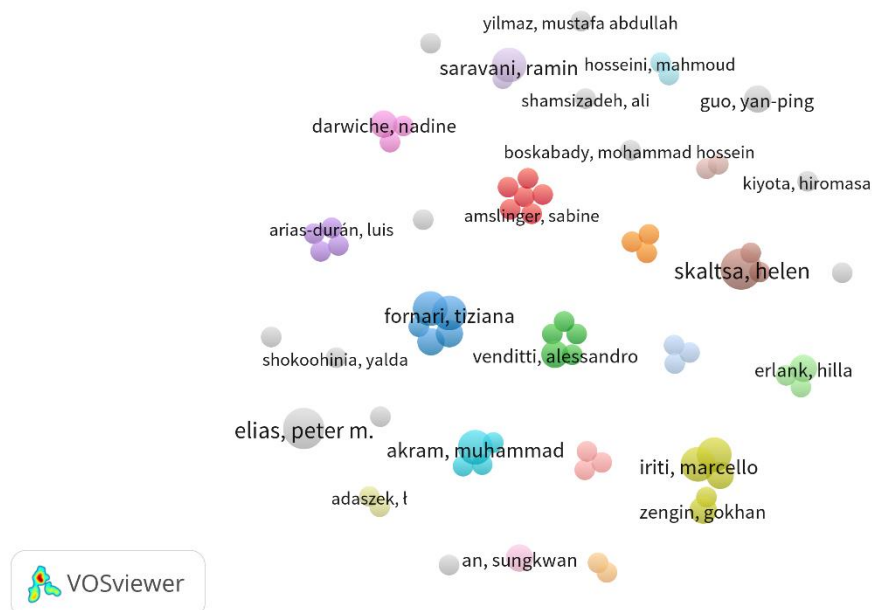

Figure S1. Co-authorship/co-occurrence authors networks.

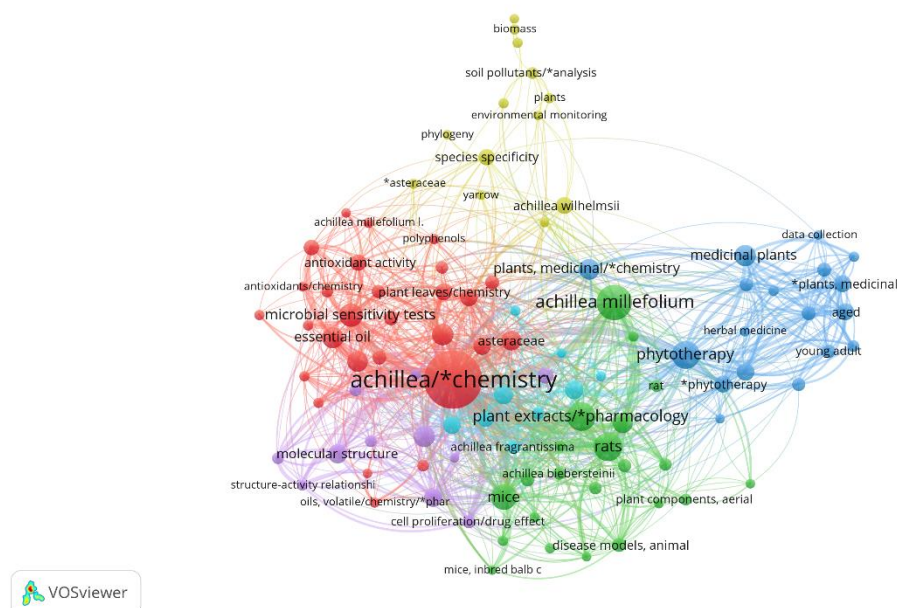

Figure S2. Keyword map based on shared networks.

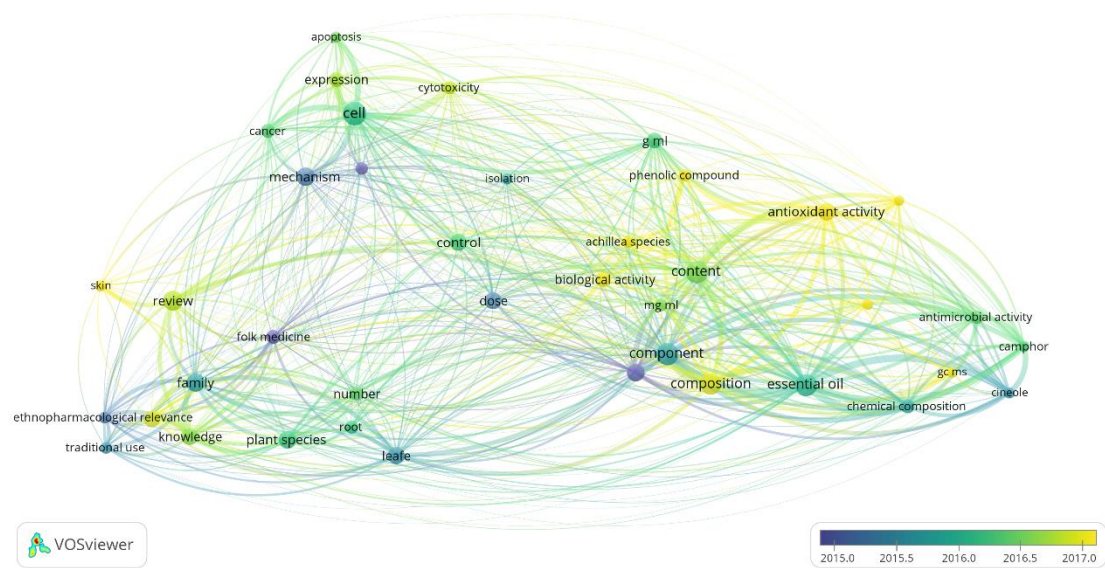

Figure S3. Term map from the titles and abstracts on shared networks.
